# Supplementary material for: Therapeutic Efficiency of Proteins Secreted by Glial Progenitor Cells in a Rat Model of Traumatic Brain Injury
Source: MDPI journal article supplement (doi:10.3390/ijms241512341), 2023-08-02
Supplement: s1 [file s1]

Table S1. Proteomic analysis of protein complex (Mw 5-100 kDa).

| <b>Protein.name</b>                                                                                                                                                            | <b>Protein.<br/>accession.<br/>number</b> | <b>Gene.<br/>simbol</b> | <b>GPCs_p15<br/>_1</b> | <b>GPCs_p1<br/>5_2</b> | <b>GPCs_p15<br/>_3</b> | <b>Average</b> |
|--------------------------------------------------------------------------------------------------------------------------------------------------------------------------------|-------------------------------------------|-------------------------|------------------------|------------------------|------------------------|----------------|
| T cell receptor alpha<br>joining 56 (Fragment)<br>OS=Homo sapiens<br>OX=966 GN=TRAJ56<br>PE=4 SV=1                                                                             | AA75B6Z2                                  | TRAJ56                  | 17.86885               | 39.22892               | 23.16522               | 26.49          |
| Ataxin-1 OS=Homo<br>sapiens OX=966<br>GN=ATXN1 PE=1 SV=2                                                                                                                       | P54253                                    | ATXN1                   | 16.13769               | 3.313253               | 7.721739               | 18.58          |
| Isoform 2 of Insulin-like<br>growth factor-binding<br>protein 7 OS=Homo<br>sapiens OX=966<br>GN=IGFBP7                                                                         | Q1627                                     | IGFBP7                  | 37.97845               | 3.566266               | 1.286957               | 14.27          |
| Serpin peptidase inhibitor,<br>clade B (Ovalbumin),<br>member 6, isoform CRA_a<br>OS=Homo sapiens<br>OX=966 GN=SERPINB6<br>PE=3 SV=1                                           | AA24QZX3                                  | SERPINB<br>6            | 23.73178               | 0                      | 15.44348               | 13.58          |
| Annexin OS=Homo<br>sapiens OX=966<br>GN=ANXA2 PE=2 SV=1                                                                                                                        | AA24R5Z7                                  | ANXA2                   | 14.23968               | 3.566266               | 21.87827               | 13.23          |
| Filamin-A OS=Homo<br>sapiens OX=966<br>GN=FLNA PE=1 SV=4                                                                                                                       | P21333                                    | FLNA                    | 22.78257               | 0                      | 16.73435               | 13.18          |
| Desmoglein-1 OS=Homo<br>sapiens OX=966<br>GN=DSG1 PE=1 SV=2                                                                                                                    | Q2413                                     | DSG1                    | 7.59417                | 17.83133               | 1.295652               | 11.97          |
| Dermcidin OS=Homo<br>sapiens OX=966 GN=DCD<br>PE=1 SV=2                                                                                                                        | P8165                                     | DCD                     | 9.492711               | 16.48193               | 9.869565               | 11.52          |
| Serpin peptidase inhibitor,<br>clade E (Nexin,<br>plasminogen activator<br>inhibitor type 1), member<br>1, isoform CRA_b<br>OS=Homo sapiens<br>OX=966 GN=SERPINE1<br>PE=3 SV=1 | AA24QYT5                                  | SERPINE<br>1            | 11.39125               | 0                      | 12.86957               | 8.87           |
| Filamin-C OS=Homo<br>sapiens OX=966                                                                                                                                            | Q14315                                    | FLNC                    | 17.86885               | 1.783133               | 7.721739               | 8.86           |

|                                                                                    |           |          |          |          |          |      |
|------------------------------------------------------------------------------------|-----------|----------|----------|----------|----------|------|
| GN=FLNC PE=1 SV=3                                                                  |           |          |          |          |          |      |
| Isoform 2 of Cytosol aminopeptidase OS=Homo sapiens OX=966 GN=LAP3                 | P28838    | LAP3     | 16.13769 | 0        | 1.295652 | 8.81 |
| Fibronectin OS=Homo sapiens OX=966 GN=FN1 PE=4 SV=1                                | AA24R462  | FN1      | 2.883965 | 0        | 5.147827 | 8.68 |
| Aspartate aminotransferase, mitochondrial OS=Homo sapiens OX=966 GN=GOT2 PE=1 SV=3 | P55       | GOT2     | 11.39125 | 0        | 14.15652 | 8.52 |
| Serpin B3 OS=Homo sapiens OX=966 GN=SERPINB3 PE=1 SV=2                             | P2958     | SERPINB3 | 4.746356 | 1.698795 | 9.869565 | 8.15 |
| Isoform 1 of Four and a half LIM domains protein 1 OS=Homo sapiens OX=966 GN=FHL1  | Q13642    | FHL1     | 14.23968 | 0        | 7.721739 | 7.32 |
| Glutathione synthetase OS=Homo sapiens OX=966 GN=GSS PE=1 SV=1                     | AA2R8Y43  | GSS      | 14.23968 | 0        | 6.434783 | 6.89 |
| Galectin OS=Homo sapiens OX=966 PE=2 SV=1                                          | AA384MR27 | LGALS1   | 14.23968 | 0        | 6.434783 | 6.89 |
| Gremlin OS=Homo sapiens OX=966 GN=GREM1 PE=2 SV=1                                  | A6XAA7    | GREM1    | 14.23968 | 0        | 6.434783 | 6.89 |
| Parkinson disease protein 7 OS=Homo sapiens OX=966 GN=PARK7 PE=1 SV=2              | Q99497    | PARK7    | 15.18834 | 0        | 5.147827 | 6.78 |
| Isoform 4 of Calumenin OS=Homo sapiens OX=966 GN=CALU                              | O43852    | CALU     | 6.644898 | 0        | 11.58269 | 6.76 |
| Keratinocyte proline-rich protein OS=Homo sapiens OX=966 GN=KPRP PE=1 SV=1         | Q5T749    | KPRP     | 0        | 12.48193 | 7.721739 | 6.73 |
| Quinone oxidoreductase PIG3 OS=Homo sapiens OX=966 GN=TP53I3                       | Q53FA7    | TP53I3   | 12.34525 | 0        | 7.721739 | 6.69 |

|                                                                                                      |          |          |          |          |          |      |
|------------------------------------------------------------------------------------------------------|----------|----------|----------|----------|----------|------|
| PE=1 SV=2                                                                                            |          |          |          |          |          |      |
| Desmoplakin OS=Homo sapiens OX=966 GN=DSP PE=1 SV=3                                                  | P15924   | DSP      | 4.746356 | 7.132531 | 7.721739 | 6.53 |
| Polyubiquitin-C (Fragment) OS=Homo sapiens OX=966 GN=UBC PE=1 SV=1                                   | F5H2Z3   | UBC      | 7.59417  | 3.566266 | 7.721739 | 6.29 |
| Isoform 4 of Superoxide dismutase [Mn], mitochondrial OS=Homo sapiens OX=966 GN=SOD2                 | P4179    | SOD2     | 11.39125 | 1.783133 | 5.147827 | 6.17 |
| Probable aminopeptidase NPEPL1 OS=Homo sapiens OX=966 GN=NPEPL1 PE=1 SV=3                            | Q8NDH3   | NPEPL1   | 6.644898 | 0        | 1.295652 | 5.65 |
| Prelamin-A/C OS=Homo sapiens OX=966 GN=LMNA PE=1 SV=1                                                | AA6Q8PFJ | LMNA     | 14.23968 | 0        | 2.573913 | 5.64 |
| Nicotinate-nucleotide pyrophosphorylase [carboxylating] OS=Homo sapiens OX=966 GN=HEL-S-9n PE=1 SV=1 | V9HWJ5   | HEL-S-9n | 12.34525 | 0        | 3.868696 | 5.45 |
| Aspartate aminotransferase OS=Homo sapiens OX=966 PE=2 SV=1                                          | AA14VK69 | GOT1     | 9.492711 | 0        | 6.434783 | 5.39 |
| Glyceraldehyde-3-phosphate dehydrogenase OS=Homo sapiens OX=966 GN=GAPDH PE=1 SV=3                   | P446     | GAPDH    | 3.797845 | 5.349398 | 5.147827 | 4.76 |
| HBA1 hemoglobin subunit alpha 1 OS=Homo sapiens OX=966 GN=HBA2 PE=3 SV=1                             | AAK2BMD8 | HBA1     | 4.746356 | 1.783133 | 7.721739 | 4.75 |
| Ferritin OS=Homo sapiens OX=966 GN=FTH1 PE=3 SV=1                                                    | AA24R525 | FTH1     | 8.543442 | 0        | 5.147827 | 4.56 |
| Junction plakoglobin OS=Homo sapiens OX=966 GN=JUP PE=3 SV=1                                         | AA24R1X8 | JUP      | 0.949271 | 7.132531 | 5.147827 | 4.50 |

|                                                                             |           |          |          |          |          |      |
|-----------------------------------------------------------------------------|-----------|----------|----------|----------|----------|------|
| Cysteine and glycine-rich protein 1 OS=Homo sapiens OX=966 PE=2 SV=1        | AA384P5K2 | CSRP1    | 5.695627 | 0        | 7.721739 | 4.47 |
| PRSS3 serine protease 3 OS=Homo sapiens OX=966 GN=PRSS3 PE=2 SV=1           | A1A58     | PRSS3    | 2.847813 | 5.349398 | 5.147827 | 4.45 |
| Peroxiredoxin-4 OS=Homo sapiens OX=966 GN=PRDX4 PE=1 SV=1                   | Q13162    | PRDX4    | 6.644898 | 0        | 6.434783 | 4.36 |
| Acylpyruvase FAHD1, mitochondrial OS=Homo sapiens OX=966 GN=FAHD1 PE=1 SV=2 | Q6P587    | FAHD1    | 6.644898 | 0        | 6.434783 | 4.36 |
| Vimentin OS=Homo sapiens OX=966 GN=VIM PE=1 SV=4                            | P867      | VIM      | 0        | 1.783133 | 1.295652 | 4.26 |
| Ferritin OS=Homo sapiens OX=966 GN=FTL PE=2 SV=1                            | AA384MDR3 | FTL      | 8.543442 | 0        | 3.868696 | 4.13 |
| Antithrombin-III OS=Homo sapiens OX=966 GN=SERPINC1 PE=3 SV=1               | AA24R944  | SERPINC1 | 1.441983 | 0        | 1.286957 | 4.00 |
| Isoform 3 of Nucleoside diphosphate kinase B OS=Homo sapiens OX=966 GN=NME2 | P22392    | NME2     | 7.59417  | 1.783133 | 2.573913 | 3.98 |
| Cystatin-A OS=Homo sapiens OX=966 GN=CSTA PE=1 SV=1                         | P14       | CSTA     | 2.847813 | 0        | 6.434783 | 3.94 |
| Thioredoxin OS=Homo sapiens OX=966 GN=TXN PE=2 SV=1                         | H9ZYJ2    | TXN      | 6.644898 | 3.566266 | 1.286957 | 3.83 |
| Omega-amidase NIT2 OS=Homo sapiens OX=966 GN=NIT2 PE=1 SV=1                 | Q9NQR4    | NIT2     | 8.543442 | 0        | 2.573913 | 3.76 |
| Isoform 1B of Desmocollin-1 OS=Homo sapiens OX=966 GN=DSC1                  | Q8554     | DSC1     | 3.797845 | 3.566266 | 3.868696 | 3.74 |
| Fatty acid binding protein 5 (Psoriasis-associated)                         | E7DVW5    | FABP5    | 5.695627 | 0        | 5.147827 | 3.61 |

|                                                                                |           |        |          |          |          |      |
|--------------------------------------------------------------------------------|-----------|--------|----------|----------|----------|------|
| OS=Homo sapiens<br>OX=966 GN=FABP5<br>PE=3 SV=1                                |           |        |          |          |          |      |
| Protein S1-A8 OS=Homo sapiens<br>OX=966 GN=S1A8 PE=1 SV=1                      | P519      | S1A8   | 3.797845 | 1.783133 | 5.147827 | 3.58 |
| S-adenosylmethionine synthase OS=Homo sapiens<br>OX=966 PE=2 SV=1              | AA14VJP5  | MAT2A  | 6.644898 | 0        | 3.868696 | 3.52 |
| LIM and SH3 domain protein 1 OS=Homo sapiens<br>OX=966 GN=LASP1 PE=4 SV=1      | AA24R1S8  | LASP1  | 3.797845 | 0        | 6.434783 | 3.42 |
| Proteasome subunit alpha type OS=Homo sapiens<br>OX=966 GN=HEL-S-276 PE=2 SV=1 | AAKK1K4   | PSMA7  | 7.59417  | 0        | 2.573913 | 3.39 |
| Delta-tubulin OS=Homo sapiens<br>OX=966 PE=2 SV=1                              | B3KML9    | TUBB4B | 2.847813 | 1.783133 | 5.147827 | 3.26 |
| Protein S1-A6 OS=Homo sapiens<br>OX=966 GN=S1A6 PE=1 SV=1                      | P673      | S1A6   | 1.898542 | 3.566266 | 3.868696 | 3.19 |
| 14-3-3 protein zeta/delta OS=Homo sapiens<br>OX=966 GN=YWHAZ PE=2 SV=1         | DPNI1     | YWHAZ  | 5.695627 | 0        | 3.868696 | 3.19 |
| ZYX protein (Fragment) OS=Homo sapiens<br>OX=966 GN=ZYX PE=2 SV=2              | B4DQR8    | ZYX    | 5.695627 | 0        | 3.868696 | 3.19 |
| Heat shock cognate 71 kDa protein OS=Homo sapiens<br>OX=966 GN=HSPA8 PE=1 SV=1 | P11142    | HSPA8  | 0        | 1.783133 | 7.721739 | 3.17 |
| Protein S1-A7 OS=Homo sapiens<br>OX=966 GN=S1A7 PE=1 SV=4                      | P31151    | S1A7   | 1.898542 | 1.783133 | 2.573913 | 2.85 |
| Elongation factor 1-alpha 1 OS=Homo sapiens<br>OX=966 PE=4 SV=1                | AA4D5RAC7 | EEF1A1 | 1.898542 | 1.783133 | 2.573913 | 2.85 |
| Neutrophil defensin 1 OS=Homo sapiens<br>OX=966 GN=DEFA1                       | P59665    | DEFA1  | 2.847813 | 1.783133 | 3.868696 | 2.84 |

|                                                                                                      |            |           |          |          |          |      |
|------------------------------------------------------------------------------------------------------|------------|-----------|----------|----------|----------|------|
| PE=1 SV=1                                                                                            |            |           |          |          |          |      |
| Macrophage migration inhibitory factor<br>OS=Homo sapiens<br>OX=966 GN=MIF PE=2<br>SV=1              | I4AY87     | MIF       | 2.847813 | 1.783133 | 3.868696 | 2.84 |
| enolase 1 OS=Homo sapiens<br>OX=966 GN=HEL-S-17 PE=2<br>SV=1                                         | AA24R4F1   | ENO1      | 1.898542 | 0        | 6.434783 | 2.78 |
| Eukaryotic translation initiation factor 6<br>OS=Homo sapiens<br>OX=966 GN=EIF6 PE=1<br>SV=1         | P56537     | EIF6      | 5.695627 | 0        | 2.573913 | 2.76 |
| Inositol-1-monophosphatase<br>OS=Homo sapiens<br>OX=966 GN=IMPA1<br>PE=3 SV=1                        | AA24R83    | IMPA1     | 5.695627 | 0        | 2.573913 | 2.76 |
| Serpin B12 OS=Homo sapiens<br>OX=966 GN=SERPINB12                                                    | Q96P63     | SERPINB12 | 3.797845 | 1.783133 | 2.573913 | 2.72 |
| Lactoylglutathione lyase<br>OS=Homo sapiens<br>OX=966 GN=GLO1 PE=1<br>SV=4                           | Q476       | GLO1      | 6.644898 | 0        | 1.286957 | 2.64 |
| Cytochrome c (Fragment)<br>OS=Homo sapiens<br>OX=966 GN=CYCS PE=1<br>SV=1                            | C9JFR7     | CYCS      | 0.949271 | 1.783133 | 5.147827 | 2.63 |
| Caspase 14, apoptosis-related cysteine peptidase<br>OS=Homo sapiens<br>OX=966 GN=CASP14<br>PE=2 SV=1 | B2CIS9     | CASP14    | 2.847813 | 3.566266 | 1.286957 | 2.57 |
| Transketolase OS=Homo sapiens<br>OX=966 GN=TKT PE=1 SV=3                                             | P2941      | TKT       | 3.797845 | 0        | 3.868696 | 2.55 |
| transglutaminase 3<br>OS=Homo sapiens<br>OX=966 PE=3 SV=1                                            | AA494CJ7   | TGM3      | 1.898542 | 1.783133 | 3.868696 | 2.51 |
| Immunoglobulin heavy constant alpha 1 (Fragment)<br>OS=Homo sapiens<br>OX=966                        | AA286Y EY1 | IGHA1     | 1.898542 | 1.783133 | 3.868696 | 2.51 |

|                                                                          |           |        |          |          |          |      |
|--------------------------------------------------------------------------|-----------|--------|----------|----------|----------|------|
| GN=IGHA1 PE=1 SV=1                                                       |           |        |          |          |          |      |
| Nucleolin OS=Homo sapiens OX=966 GN=NCL PE=1 SV=1                        | AA7I2V3F3 | NCL    | 4.746356 | 0        | 2.573913 | 2.45 |
| 4S ribosomal protein S25 OS=Homo sapiens OX=966 GN=RPS25 PE=1 SV=1       | P62851    | RPS25  | 0.949271 | 3.566266 | 2.573913 | 2.36 |
| Myotrophin OS=Homo sapiens OX=966 GN=MTPN PE=1 SV=1                      | C9JL85    | MTPN   | 5.695627 | 0        | 1.286957 | 2.33 |
| Folate gamma-glutamyl hydrolase OS=Homo sapiens OX=966 GN=GGH PE=1 SV=1  | AA7I2YQQ3 | GGH    | 0.949271 | 0        | 5.147827 | 2.32 |
| 6S acidic ribosomal protein P2 OS=Homo sapiens OX=966 GN=RPLP2 PE=3 SV=1 | AA24RCA7  | RPLP2  | 0.949271 | 1.783133 | 3.868696 | 2.20 |
| Fumarylacetoacetase OS=Homo sapiens OX=966 PE=2 SV=1                     | AA384P5L6 | FAH    | 3.797845 | 0        | 2.573913 | 2.12 |
| Proteasome subunit beta OS=Homo sapiens OX=966 PE=2 SV=1                 | AA14VK45  | PSMB1  | 3.797845 | 0        | 2.573913 | 2.12 |
| Myeloid-derived growth factor OS=Homo sapiens OX=966 GN=MYDGF PE=1 SV=1  | Q969H8    | MYDGF  | 4.746356 | 0        | 1.286957 | 2.11 |
| C4a anaphylatoxin OS=Homo sapiens OX=966 GN=C4B_2 PE=1 SV=1              | AAG2JL54  | C4A    | 0.949271 | 3.566266 | 1.286957 | 1.93 |
| Arginase-1 OS=Homo sapiens OX=966 GN=ARG1 PE=1 SV=2                      | P589      | ARG1   | 0.949271 | 3.566266 | 1.286957 | 1.93 |
| Cathepsin D OS=Homo sapiens OX=966 GN=CTSD PE=1 SV=1                     | AA1BGV23  | CTSD   | 1.898542 | 0        | 3.868696 | 1.92 |
| Caldesmon 1, isoform CRA_i OS=Homo sapiens OX=966 GN=CALD1 PE=2 SV=1     | AA14VKA   | CALD1  | 1.898542 | 0        | 3.868696 | 1.92 |
| Collagen, type I, alpha 1, isoform CRA_a OS=Homo                         | D3DTX7    | COL1A1 | 1.898542 | 0        | 3.868696 | 1.92 |

|                                                                                                                                                                      |               |        |          |          |          |      |
|----------------------------------------------------------------------------------------------------------------------------------------------------------------------|---------------|--------|----------|----------|----------|------|
| sapiens OX=966<br>GN=COL1A1 PE=4 SV=1                                                                                                                                |               |        |          |          |          |      |
| Triosephosphate isomerase<br>OS=Homo sapiens<br>OX=966 PE=2 SV=1                                                                                                     | B4DUI5        | TPI1   | 0        | 1.783133 | 3.868696 | 1.88 |
| Peroxiredoxin-1 OS=Homo<br>sapiens OX=966 PE=2<br>SV=1                                                                                                               | AA384NPQ2     | PRDX1  | 2.847813 | 0        | 2.573913 | 1.87 |
| Enhancer of rudimentary<br>homolog OS=Homo<br>sapiens OX=966 GN=ERH<br>PE=3 SV=1                                                                                     | AA24R6D4      | ERH    | 0.949271 | 1.783133 | 2.573913 | 1.77 |
| Fumarylacetoacetate<br>hydrolase domain<br>containing 2A, isoform<br>CRA_a OS=Homo sapiens<br>OX=966 GN=FAHD2A<br>PE=3 SV=1                                          | AA24RE24      | FAHD2A | 3.797845 | 0        | 1.286957 | 1.69 |
| Proteasome subunit alpha<br>type OS=Homo sapiens<br>OX=966 PE=2 SV=1                                                                                                 | AA14VK43      | PSMA3  | 3.797845 | 0        | 1.286957 | 1.69 |
| Peptidyl-prolyl cis-trans<br>isomerase FKBP1A<br>OS=Homo sapiens<br>OX=966 GN=FKBP1A<br>PE=1 SV=2                                                                    | P62942        | FKBP1A | 3.797845 | 0        | 1.286957 | 1.69 |
| Coatomer subunit beta'<br>OS=Homo sapiens<br>OX=966 GN=COPB2<br>PE=1 SV=2                                                                                            | HY938         | COPB2  | 3.797845 | 0        | 1.286957 | 1.69 |
| Kallikrein G OS=Homo<br>sapiens OX=966<br>GN=KLNG PE=4 SV=1                                                                                                          | AA1R3UDR<br>5 | KLK11  | 1.898542 | 0        | 1.286957 | 1.62 |
| IGKC protein OS=Homo<br>sapiens OX=966<br>GN=IGK@ PE=1 SV=1                                                                                                          | AA5H1ZRQ<br>3 | IGKC   | 1.898542 | 0        | 1.286957 | 1.62 |
| Heterogeneous nuclear<br>ribonucleoprotein D (AU-<br>rich element RNA binding<br>protein 1, 37kDa), isoform<br>CRA_e OS=Homo sapiens<br>OX=966 GN=HNRPD<br>PE=4 SV=1 | AA24RDF4      | HNRNPD | 1.898542 | 0        | 1.286957 | 1.62 |
| Collagen alpha-1(III) chain<br>OS=Homo sapiens<br>OX=966 GN=COL3A1                                                                                                   | P2461         | COL3A1 | 1.898542 | 0        | 1.286957 | 1.62 |



|                                                                                              |          |        |          |          |          |      |
|----------------------------------------------------------------------------------------------|----------|--------|----------|----------|----------|------|
| PE=1 SV=4                                                                                    |          |        |          |          |          |      |
| cDNA FLJ51896, highly similar to Glia-derived nexin OS=Homo sapiens OX=966 PE=2 SV=1         | B4DMR3   | B4DMR3 | 1.898542 | 0        | 1.286957 | 1.62 |
| colony stimulating factor 2 receptor subunit beta OS=Homo sapiens OX=966 GN=CSF2RB PE=4 SV=1 | LR5A1    | CSF2RB | 0        | 3.566266 | 1.286957 | 1.62 |
| Zinc-alpha-2-glycoprotein OS=Homo sapiens OX=966 PE=2 SV=1                                   | AA14VK   | AZGP1  | 1.898542 | 0        | 2.573913 | 1.50 |
| Lipocalin 1 (Tear prealbumin), isoform CRA_a OS=Homo sapiens OX=966 GN=LCN1 PE=3 SV=1        | AA24R8D7 | LCN1   | 1.898542 | 0        | 2.573913 | 1.50 |
| Nucleophosmin (Fragment) OS=Homo sapiens OX=966 GN=NPM1 PE=2 SV=1                            | AAS2Z491 | NPM1   | 1.898542 | 0        | 2.573913 | 1.50 |
| Gamma-glutamylcyclotransferase OS=Homo sapiens OX=966 GN=C7orf24 PE=4 SV=1                   | AA9N7V5  | GGCT   | 1.898542 | 0        | 2.573913 | 1.50 |
| Cofilin-1 OS=Homo sapiens OX=966 GN=CFL1 PE=1 SV=3                                           | P23528   | CFL1   | 1.898542 | 0        | 2.573913 | 1.50 |
| Alternative protein RCOR1 OS=Homo sapiens OX=966 GN=RCOR1 PE=4 SV=1                          | LR8D2    | LR8D2  | 1.898542 | 0        | 2.573913 | 1.50 |
| Transaldolase OS=Homo sapiens OX=966 PE=2 SV=1                                               | AA14VK56 | TALDO1 | 1.898542 | 0        | 2.573913 | 1.50 |
| Reticulocalbin-1 OS=Homo sapiens OX=966 GN=RCN1 PE=1 SV=1                                    | Q15293   | RCN1   | 1.898542 | 0        | 2.573913 | 1.50 |
| Ubiquitin-like protein FUBI; FAU OS=Homo sapiens OX=966 GN=FAU PE=1 SV=1                     | E9PR3    | FAU    | 1.898542 | 0        | 2.573913 | 1.50 |

|                                                                                                  |           |         |          |          |          |      |
|--------------------------------------------------------------------------------------------------|-----------|---------|----------|----------|----------|------|
| N(4)-(beta-N-acetylglucosaminy)-L-asparaginase OS=Homo sapiens OX=966 GN=AGA PE=1 SV=2           | P2933     | AGA     | 1.898542 | 0        | 2.573913 | 1.50 |
| Non-histone chromosomal protein HMG-17 OS=Homo sapiens OX=966 GN=HMGN2 PE=1 SV=3                 | P524      | HMGN2   | 1.898542 | 0        | 2.573913 | 1.50 |
| Lactotransferrin (Fragment) OS=Homo sapiens OX=966 PE=2 SV=1                                     | B3KSL2    | LTF     | 0        | 1.783133 | 2.573913 | 1.45 |
| Eukaryotic translation initiation factor 5A (Fragment) OS=Homo sapiens OX=966 GN=EIF5A PE=1 SV=8 | I3L397    | EIF5A   | 2.847813 | 0        | 1.286957 | 1.38 |
| Cytochrome c oxidase subunit 7A2, mitochondrial OS=Homo sapiens OX=966 GN=COX7A2 PE=1 SV=1       | D6RIE3    | COX7A2  | 0.949271 | 1.783133 | 1.286957 | 1.34 |
| Protein Shroom3 OS=Homo sapiens OX=966 GN=SHROOM3 PE=1 SV=2                                      | Q8TF72    | SHROOM3 | 7.59417  | 5.349398 | 18.17391 | 1.32 |
| Lysozyme C OS=Homo sapiens OX=966 GN=LYZ PE=2 SV=1                                               | B2R4C5    | LYZ     | 0        | 1.783133 | 1.286957 | 1.23 |
| Alpha-2-HS-glycoprotein OS=Homo sapiens OX=966 PE=2 SV=1                                         | B7Z8Q2    | AHSG    | 0        | 1.783133 | 1.286957 | 1.23 |
| ATP synthase membrane subunit K, mitochondrial OS=Homo sapiens OX=966 GN=ATP5MK PE=1 SV=1        | Q96IX5    | ATP5MK  | 0        | 1.783133 | 1.286957 | 1.23 |
| Corneodesmosin OS=Homo sapiens OX=966 PE=4 SV=1                                                  | AA1U9X8X5 | CDSN    | 0        | 1.783133 | 1.286957 | 1.23 |
| High mobility group AT-hook 1, isoform CRA_b OS=Homo sapiens OX=966 GN=HMGA1                     | AA24RCT9  | HMGA1   | 1.898542 | 1.783133 | 0        | 1.23 |

|                                                                                                |          |         |          |          |          |      |
|------------------------------------------------------------------------------------------------|----------|---------|----------|----------|----------|------|
| PE=3 SV=1                                                                                      |          |         |          |          |          |      |
| ATP synthase subunit alpha, mitochondrial<br>OS=Homo sapiens<br>OX=966 GN=ATP5F1A<br>PE=1 SV=1 | P2575    | ATP5F1A | 0.949271 | 0        | 2.573913 | 1.17 |
| IgG H chain OS=Homo sapiens<br>OX=966 PE=1 SV=1                                                | S6B291   | S6B291  | 0.949271 | 0        | 2.573913 | 1.17 |
| Carboxypeptidase A4<br>OS=Homo sapiens<br>OX=966 GN=CPA4 PE=2 SV=1                             | A4D1M3   | CPA4    | 0.949271 | 0        | 2.573913 | 1.17 |
| CD44 antigen OS=Homo sapiens<br>OX=966 GN=CD44 PE=1 SV=3                                       | P167     | CD44    | 0.949271 | 0        | 2.573913 | 1.17 |
| D-aminoacyl-tRNA deacylase OS=Homo sapiens<br>OX=966 GN=DTD1 PE=2 SV=1                         | Q496C9   | DTD1    | 0.949271 | 0        | 2.573913 | 1.17 |
| Aspartyl aminopeptidase<br>OS=Homo sapiens<br>OX=966 GN=DNPEP<br>PE=3 SV=1                     | Q53SB6   | DNPEP   | 0.949271 | 0        | 2.573913 | 1.17 |
| Peptidyl-prolyl cis-trans isomerase OS=Homo sapiens<br>OX=966 PE=2 SV=1                        | A8K486   | PPIA    | 0.949271 | 0        | 2.573913 | 1.17 |
| Apolipoprotein A-I, isoform CRA_a OS=Homo sapiens<br>OX=966 GN=APOA1 PE=2 SV=1                 | AA24R3E3 | APOA1   | 0.949271 | 0        | 2.573913 | 1.17 |
| Protein S1-A4 OS=Homo sapiens<br>OX=966 GN=S1A4 PE=1 SV=1                                      | P26447   | S1A4    | 0.949271 | 0        | 2.573913 | 1.17 |
| Dynein axonemal heavy chain 12 OS=Homo sapiens<br>OX=966 GN=DNAH12 PE=1 SV=2                   | E9PG32   | DNAH12  | 0.949271 | 1.783133 | 0        | 0.92 |
| Proteasome subunit beta<br>OS=Homo sapiens<br>OX=966 PE=2 SV=1                                 | E9KL3    | PSMB7   | 0.949271 | 1.783133 | 0        | 0.92 |
| Isoform 3 of Inhibitor of Bruton tyrosine kinase<br>OS=Homo sapiens                            | Q9P2D    | IBTK    | 0.949271 | 0        | 1.286957 | 0.75 |

|                                                                                                                              |           |           |          |   |          |      |
|------------------------------------------------------------------------------------------------------------------------------|-----------|-----------|----------|---|----------|------|
| OX=966 GN=IBTK                                                                                                               |           |           |          |   |          |      |
| Cysteine and glycine-rich protein 2, isoform CRA_a<br>OS=Homo sapiens<br>OX=966 GN=CSRP2<br>PE=2 SV=1                        | AA24RBB5  | CSRP2     | 0.949271 | 0 | 1.286957 | 0.75 |
| High mobility group protein 1 OS=Homo sapiens<br>OX=966 GN=HMGB1 PE=3 SV=1                                                   | AA24RDR   | HMGB1     | 0.949271 | 0 | 1.286957 | 0.75 |
| cDNA FLJ75914, highly similar to Homo sapiens leucine rich repeat containing 17, mRNA<br>OS=Homo sapiens<br>OX=966 PE=2 SV=1 | A8K2P     | LRRC17    | 0.949271 | 0 | 1.286957 | 0.75 |
| Apolipoprotein D (Fragment) OS=Homo sapiens<br>OX=966 GN=APOD PE=1 SV=1                                                      | C9JF17    | APOD      | 0.949271 | 0 | 1.286957 | 0.75 |
| Mitochondrial import inner membrane translocase subunit OS=Homo sapiens<br>OX=966 GN=TIMM8B PE=1 SV=1                        | G3XAN8    | TIMM8B    | 0.949271 | 0 | 1.286957 | 0.75 |
| Oxygen-regulated protein 1 OS=Homo sapiens<br>OX=966 GN=RP1 PE=1 SV=1                                                        | AA1BGTV9  | RP1       | 0.949271 | 0 | 1.286957 | 0.75 |
| cDNA FLJ53619, highly similar to Heat shock protein HSP 9-beta<br>OS=Homo sapiens<br>OX=966 PE=2 SV=1                        | B4DGL     | B4DGL     | 0.949271 | 0 | 1.286957 | 0.75 |
| Tropomyosin 1 (Alpha) isoform 4 OS=Homo sapiens<br>OX=966 GN=TPM1 PE=3 SV=1                                                  | D9YZV5    | TPM1      | 0.949271 | 0 | 1.286957 | 0.75 |
| Heterogeneous nuclear ribonucleoproteins A2/B1 OS=Homo sapiens<br>OX=966 GN=HNRNPA2B1 PE=1 SV=1                              | AA7I2V4I6 | HNRNPA2B1 | 0.949271 | 0 | 1.286957 | 0.75 |
| NAD(P)H dehydrogenase, quinone 2, isoform CRA_a<br>OS=Homo sapiens                                                           | AA24QZT9  | NQO2      | 0.949271 | 0 | 1.286957 | 0.75 |

|                                                                                        |          |        |          |   |          |      |
|----------------------------------------------------------------------------------------|----------|--------|----------|---|----------|------|
| OX=966 GN=NQO2 PE=3<br>SV=1                                                            |          |        |          |   |          |      |
| NIF3-like protein 1<br>OS=Homo sapiens<br>OX=966 GN=NIF3L1<br>PE=3 SV=1                | AA24R3V5 | NIF3L1 | 0.949271 | 0 | 1.286957 | 0.75 |
| Annexin A5 OS=Homo sapiens<br>OX=966 GN=ANXA5 PE=1 SV=2                                | P8758    | ANXA5  | 0.949271 | 0 | 1.286957 | 0.75 |
| Beta-glucuronidase<br>OS=Homo sapiens<br>OX=966 GN=GUSB PE=1<br>SV=2                   | P8236    | GUSB   | 0.949271 | 0 | 1.286957 | 0.75 |
| Ferric-chelate reductase 1<br>OS=Homo sapiens<br>OX=966 GN=FRRS1<br>PE=2 SV=2          | Q6ZNA5   | FRRS1  | 0.949271 | 0 | 1.286957 | 0.75 |
| Extracellular glycoprotein<br>lacritin OS=Homo sapiens<br>OX=966 GN=LACRT<br>PE=1 SV=1 | Q9GZZ8   | LACRT  | 0.949271 | 0 | 1.286957 | 0.75 |

Table S2. Primer sequences used for gene expression analysis by RT-PCR.

| Gene         | Primer sequences                                      | Annealing temperature, °C |
|--------------|-------------------------------------------------------|---------------------------|
| <i>Mmp2</i>  | for CAGACAAAGAGTTGGCAGTG<br>rev TCAGGTGTGTAACCAATGATC | 56.5                      |
| <i>Mmp9</i>  | for ATGGTTTCTGCCCCAGTGAG<br>rev CACCAGCGATAACCATCCGA  | 63                        |
| <i>Ttnfa</i> | for CCACCACGCTCTTCTGTCTA<br>rev GCTACGGGCTTGTCACCTCG  | 61.9                      |
| <i>Gapdh</i> | for GAGATTACTGCCCTGGCTCC<br>rev GCTCAGTAACAGTCCGCCTA  | 56.65                     |
| <i>Actb</i>  | for GCGAGATCCCGCTAACATCA<br>rev CCCTTCCACGATGCCAAAGT  | 56                        |
| <i>Il12a</i> | for CTGCCAAGTGTCTTAACCAGT<br>rev GCAGGCCTCCAGTGTGCT   | 60.5                      |
| <i>Il12b</i> | for CTGGTGTCTCCACTCATGG<br>rev CAGGTGTATTGGCCAGCATC   | 60.5                      |
| <i>Il1b</i>  | for CTGTCTGACCCATGTGAGCT<br>rev ACTCCACTTTGGTCTTGACTT | 57.4                      |
| <i>Il6</i>   | for TACATATGTTCTCAGGGAGAT<br>rev GGTAGAAACGGAAGTCCAG  | 56                        |
| <i>Il10</i>  | for GCCCAGAAATCAAGGAGCAT<br>rev TGAGTGTACGTAGGCTTCTA  | 58.8                      |

|              |                                                       |      |
|--------------|-------------------------------------------------------|------|
| <i>Timp1</i> | for CAGACAGCTTTCTGCAACTC<br>rev CACAGCGTCGAATCCTTTGA  | 58.8 |
| <i>Timp2</i> | for ATGCAGACGTAGTGATCAGG<br>rev AGTCACAGAGGGTAATGTGC  | 56   |
| <i>Bax</i>   | for TTGTGGCTGGAGTCCTCACT<br>rev TTTCCCCGTTCCCCATTCATC | 63   |
| <i>Bcl2</i>  | for GGGGCTACGAGTGGGATACT<br>rev GACGGTAGCGACGAGAGAAG  | 62.6 |
| <i>Il4</i>   | for ATGTAACGACAGCCCTCTGA<br>rev AGCACGGAGGTACATCACG   | 56.7 |
| <i>Il23</i>  | for AGAGGGTCTAGTGCAGAGCA<br>rev ATACGGGGCACGTCACCTTTT | 59.4 |
| <i>Il18</i>  | for GACAAAAGAAACCCGCCTG<br>rev ACATCCTTCCATCCTTCACAG  | 61.5 |

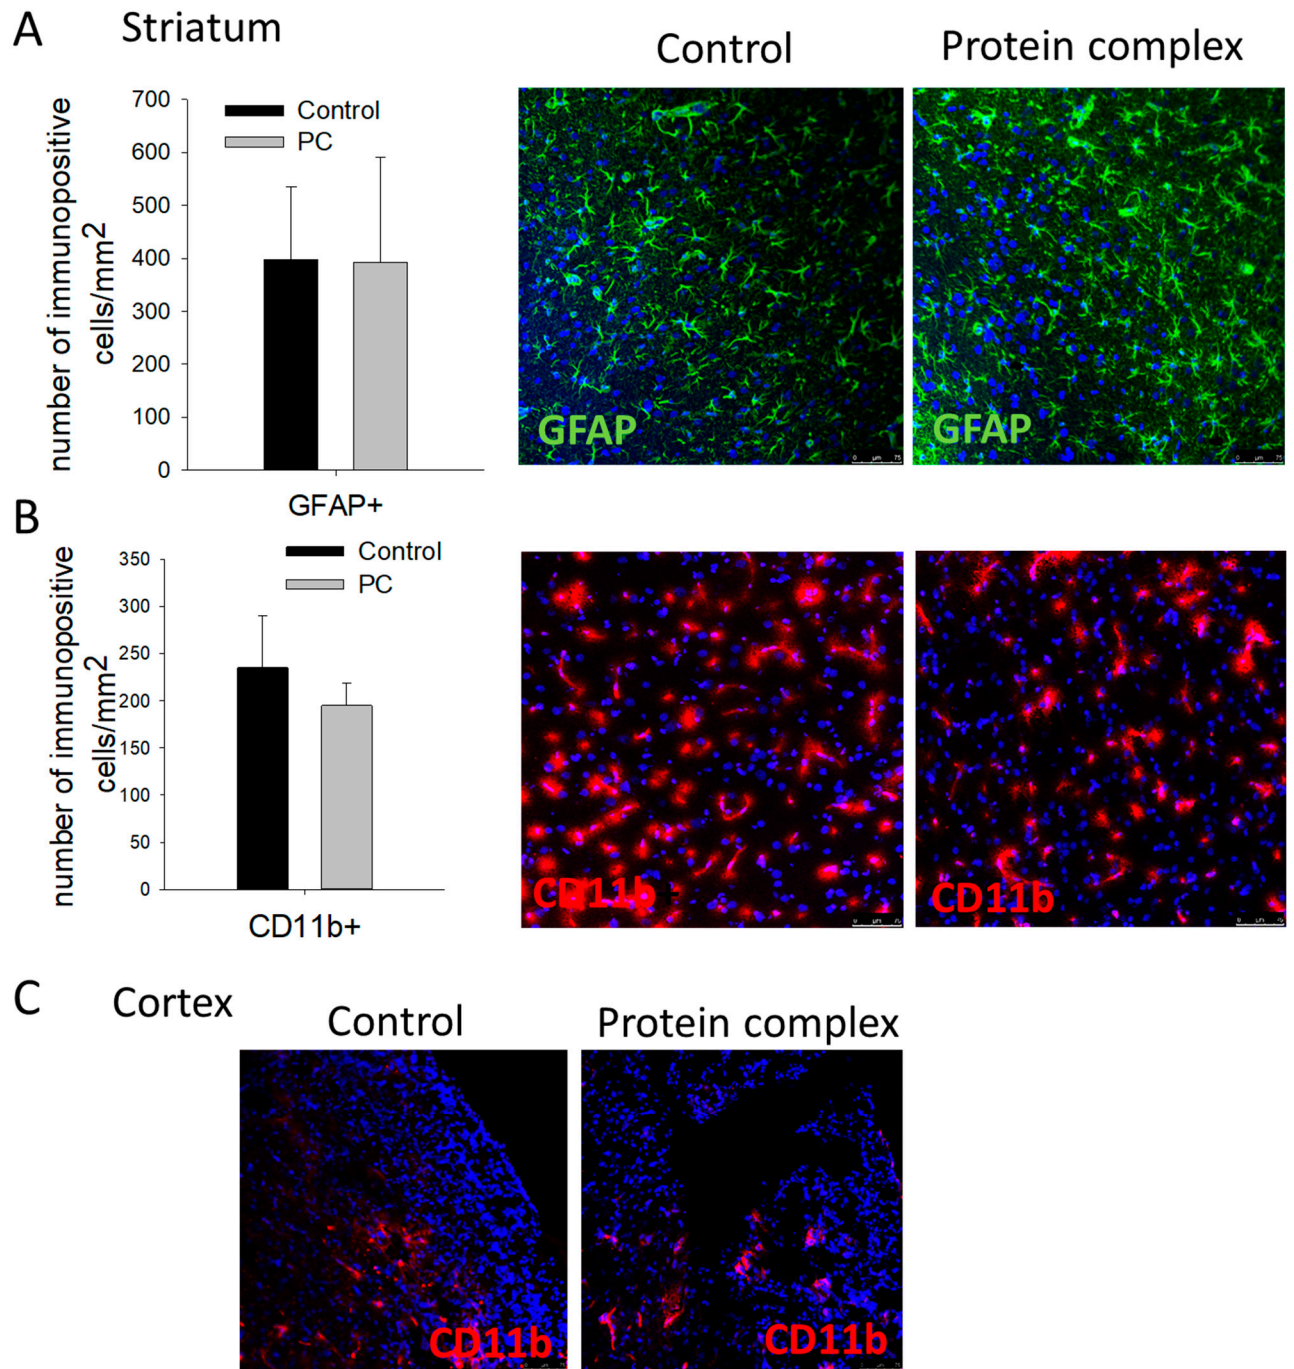

**Figure S1.** Immunohistochemical analysis of brain tissues (cortex, striatum) on day 14. Visualization and quantitation of astroglia (GFAP+) (A), and microglial cells (CD11b+) (B) in the striatum; cell nuclei counterstained with DAPI (blue);. (C) The single microglial cells (CD11b+) at the cortex damage area. Scale bars, 75  $\mu$ m. The data presented as means  $\pm$  SD, and analyzed by t-test or Mann–Whitney test.

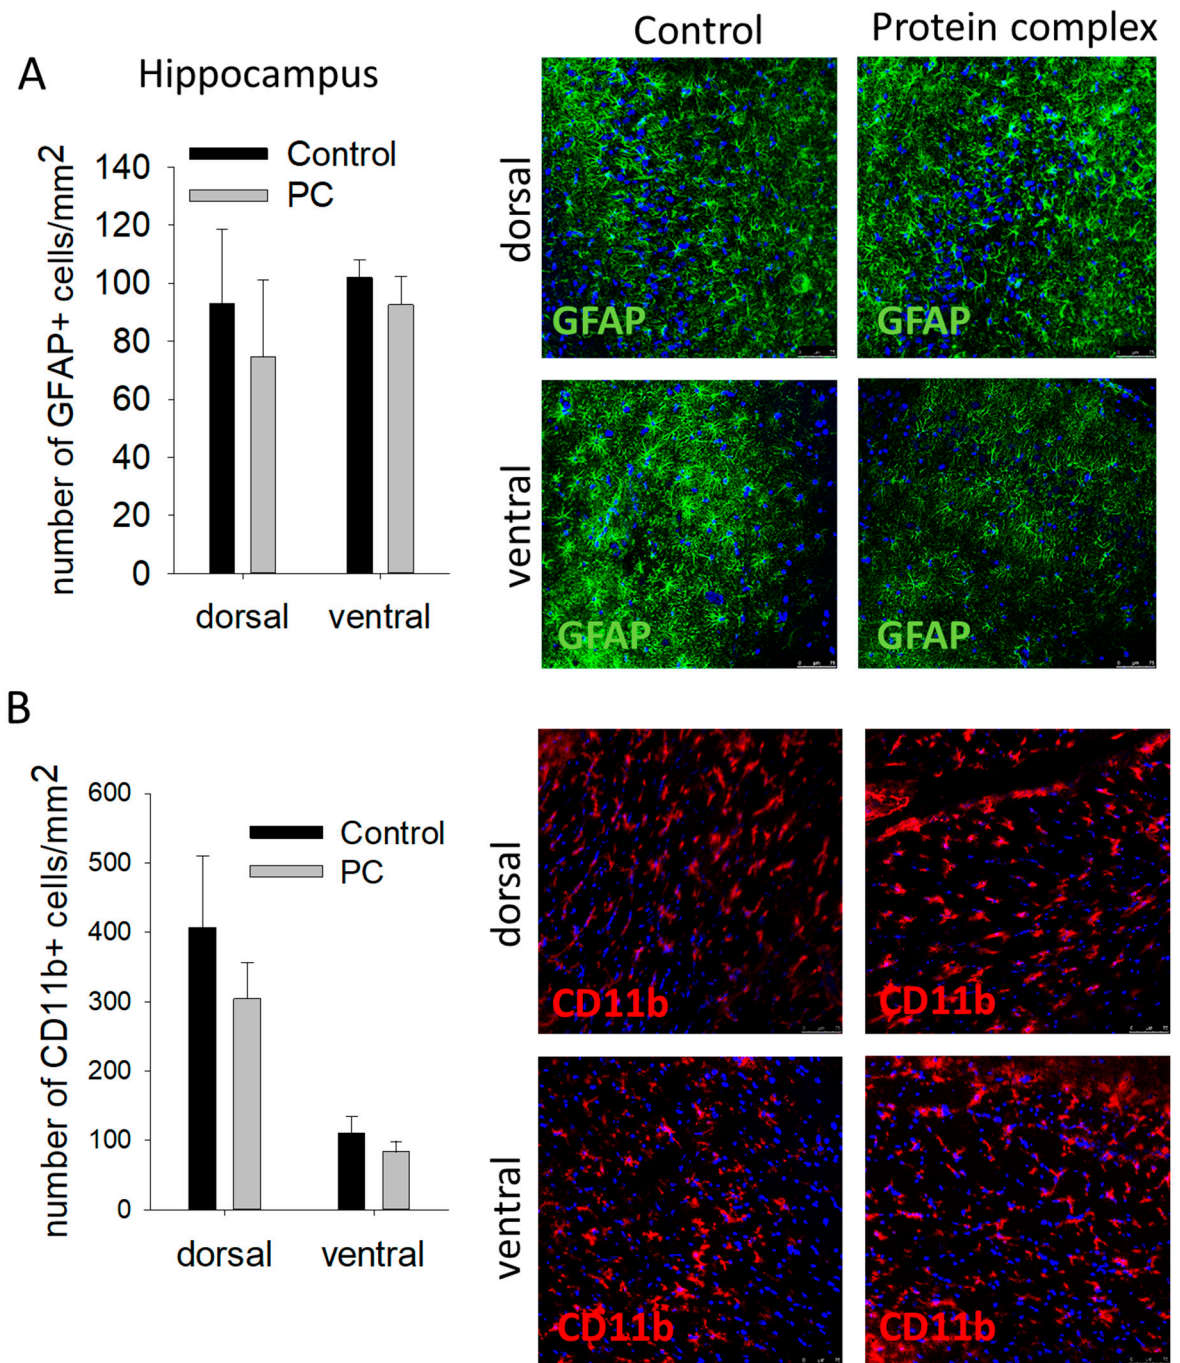

**Figure S2.** Immunohistochemical study of brain tissues (hippocampus) on day 14. Visualization and quantitation of astroglia (GFAP+) (A), and microglial cells (CD11b+) (B) in the hippocampus; cell nuclei counterstained with DAPI (blue); scale bars, 75  $\mu$ m. The data presented as means  $\pm$  SD, and analyzed by t-test or Mann–Whitney test.



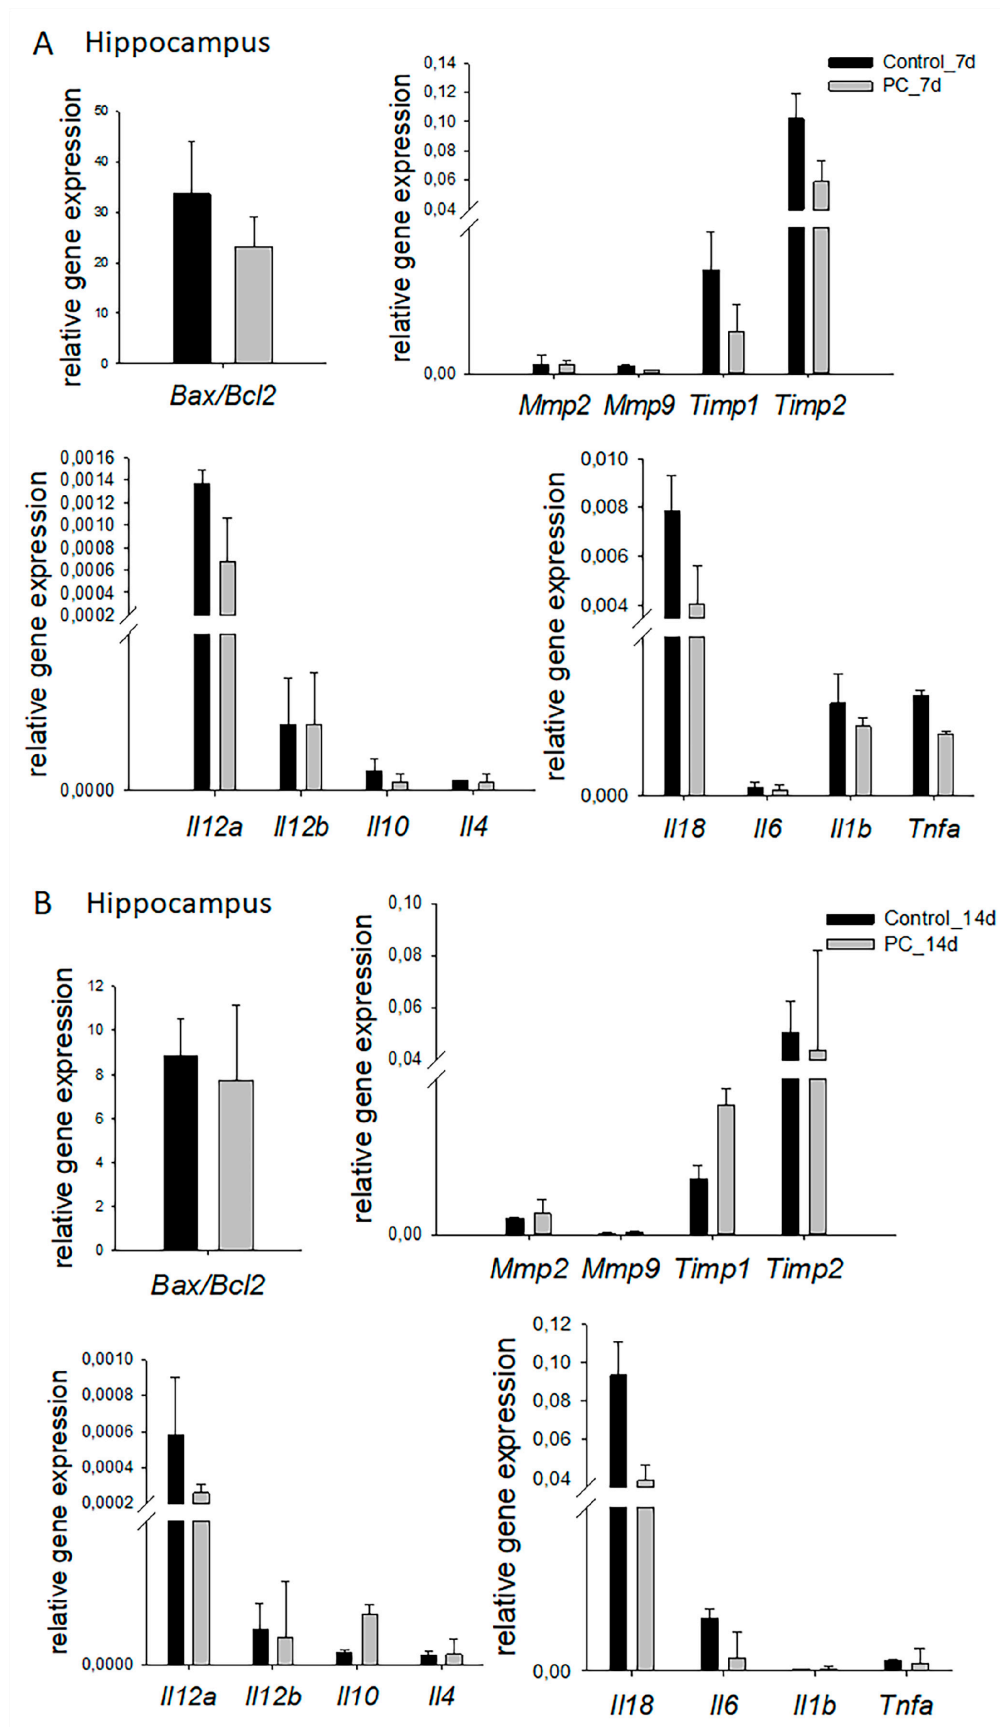

**Figure S3.** Relative expression levels of apoptosis-, extracellular matrix degradation- and inflammation-related genes in hippocampus on days 7 (A) and 14 (B). RT-PCR. The data presented as means  $\pm$  SD, analyzed by *t*-test or Mann–Whitney test.

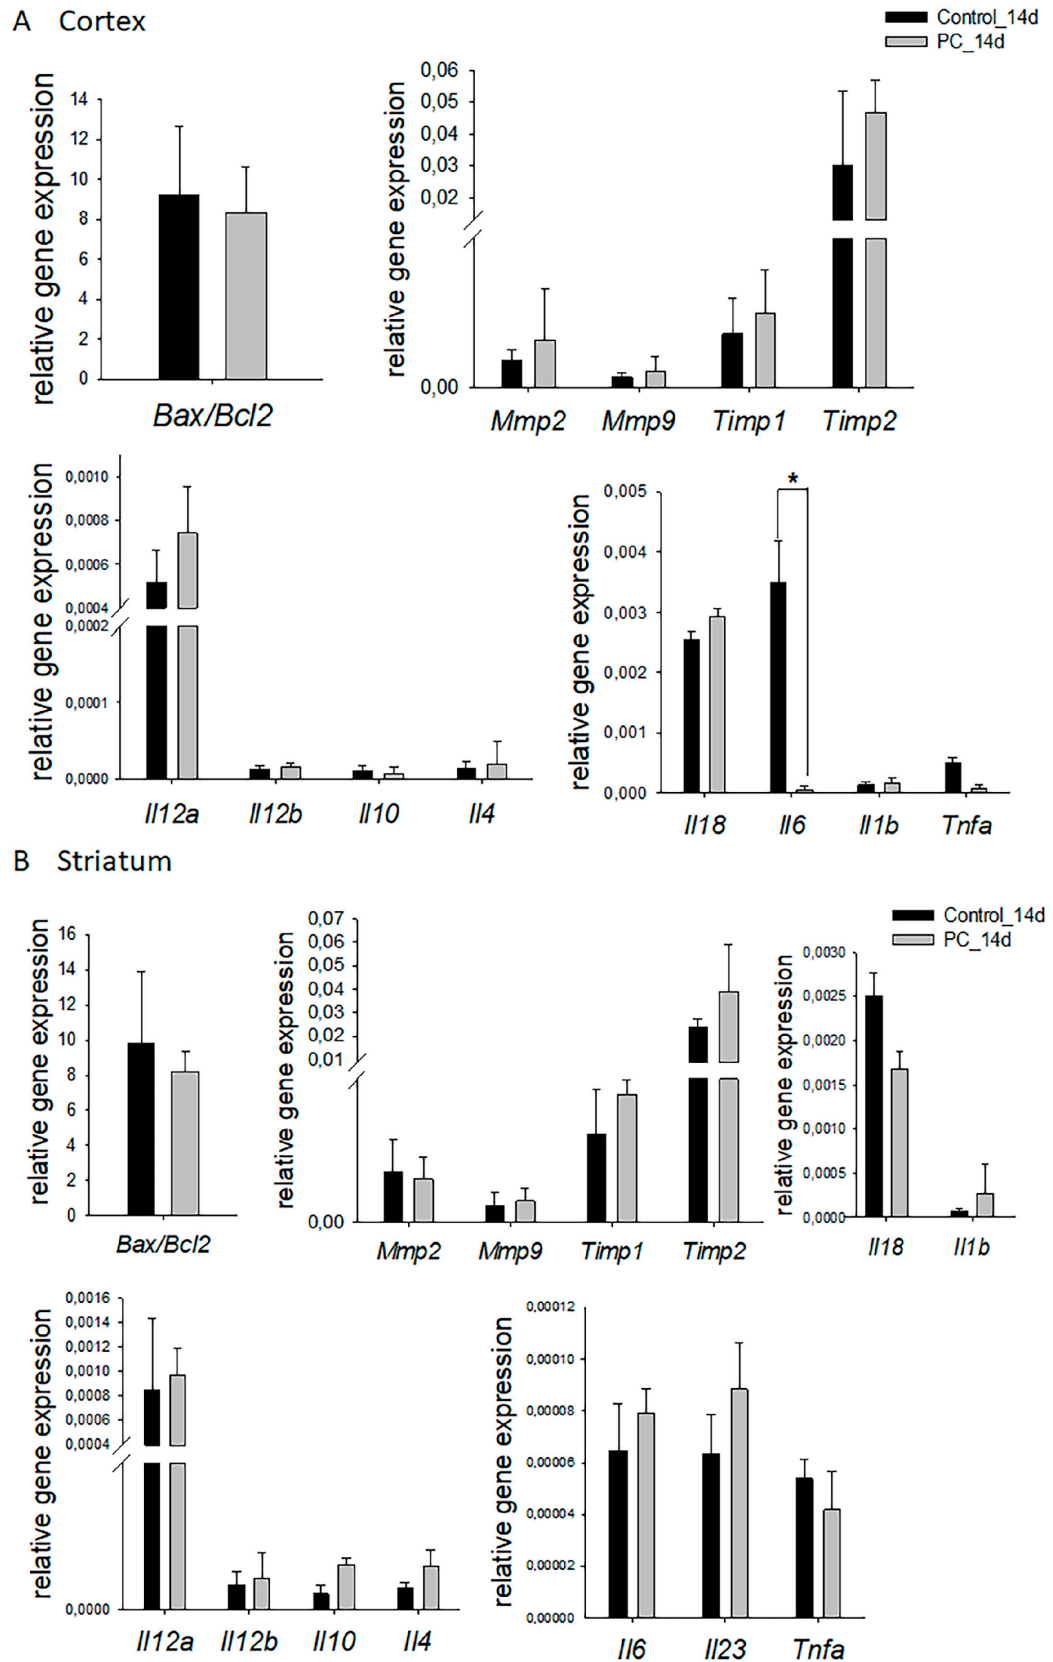

**Figure S4.** Relative expression levels of apoptosis-, extracellular matrix degradation- and inflammation-related genes in cortex (A) and striatum (B) on day 14. RT-PCR. The data presented as means  $\pm$  SD, and analyzed by *t*-test or Mann–Whitney test; \* —  $p < 0.05$  compared with the control.
